# Supplementary material for: A novel photoelectrochemical sensor for the detection of α-fetoprotein based on a mesoporous TiO2–CdS QD composite film
Source: Royal Society of Chemistry journal article supplement (doi:10.1039/c4ay02473g), 2015-01-01
Supplement: c4ay02473g1.pdf [file c4ay02473g1.pdf]

## **Supporting Information**

### **A Novel Photoelectrochemical Sensor for the Detection of $\alpha$ -Fetoprotein Based on Mesoporous TiO<sub>2</sub>-CdS QDs Composite Film**

Xiaoyan Yang\*, Jingyu Li, Junliang Fu

Shandong Provincial Key Laboratory Of Biochemical Analysis, College of Chemistry and  
Molecular Engineering, Qingdao University of Science and Technology, Qingdao 266042,  
Shandong, P. R. China.

\* Corresponding author. Tel.: +86-532-84022700, Fax: +86-532-84022700

E-mail: yangxiaoyan\_zh@126.com

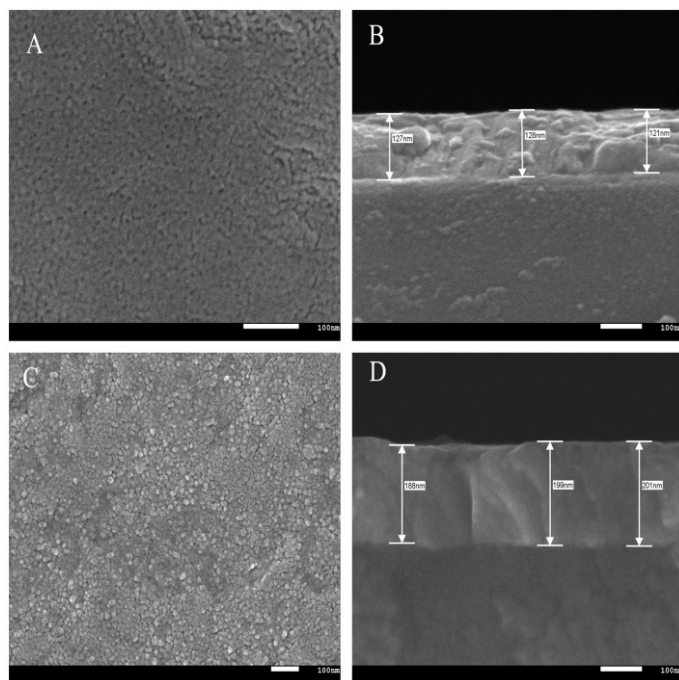

Fig. S1. The SEM of mesoporous  $\text{TiO}_2$  film and  $\text{CdS}/\text{TiO}_2/\text{ITO}$  film

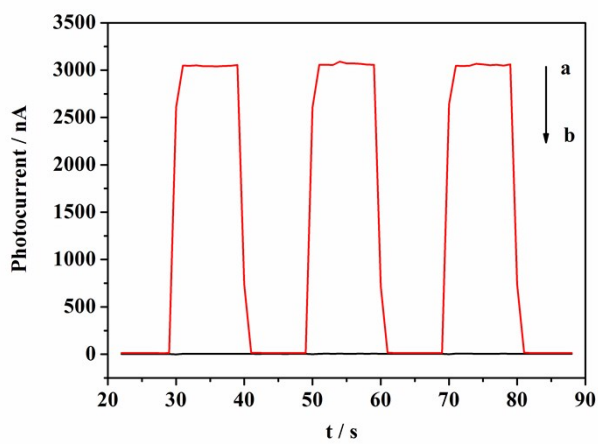

Fig. S2. Photocurrent responses of (a)  $\text{CdS}/\text{TiO}_2/\text{ITO}$  and (b)  $\text{TiO}_2/\text{ITO}$  in 0.01 M PBS solution (pH=7.4) containing 0.1 M ascorbic acid solution as electron donor with a light excitation at 400 nm.

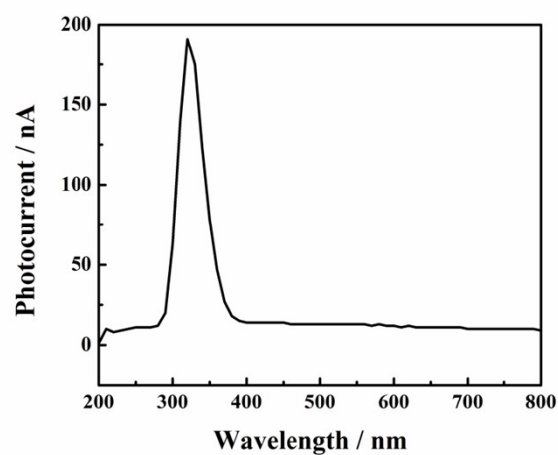

Fig. S3. Wavelengths scanning of TiO<sub>2</sub>/ITO electrode in 0.01 M PBS suffer solution (pH=7.4) containing 0.1 M ascorbic acid solution as electron donor

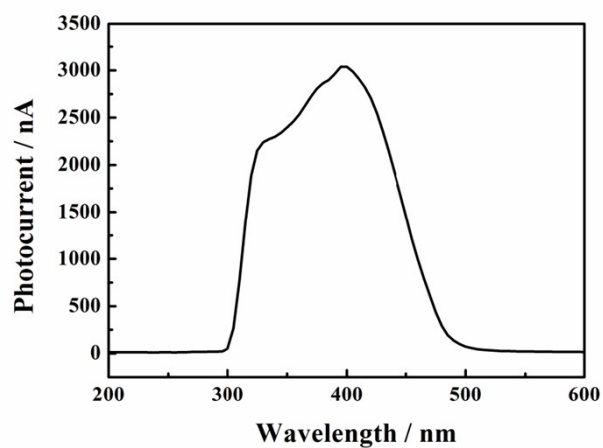

Fig. S4. Wavelengths scanning of CdS/TiO<sub>2</sub>/ITO electrode in 0.01 M PBS suffer solution (pH=7.4) containing 0.1 M ascorbic acid solution as electron donor

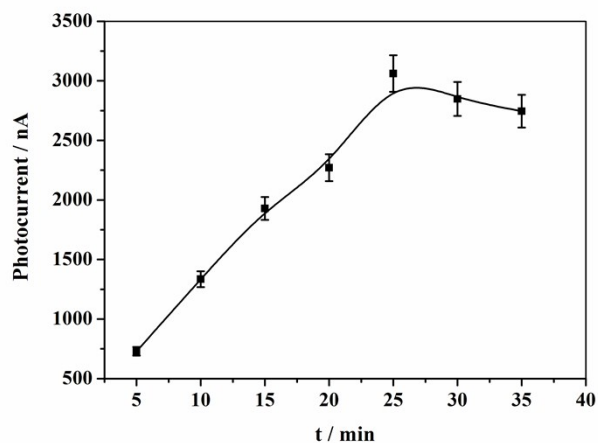

Fig. S5. Photocurrent change for CdS/TiO<sub>2</sub>/ITO with different deposition time of CdS in 0.01 M PBS suffer solution (pH=7.4) containing 0.1 M ascorbic acid solution as electron donor with a light excitation at 400 nm.

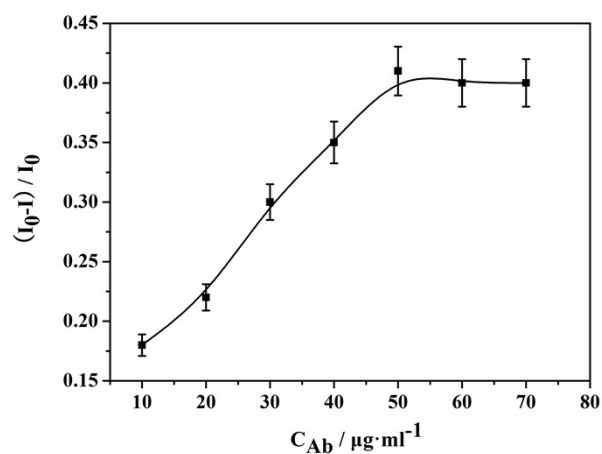

Fig. S6. Photocurrent change for different concentrations of anti-AFP on CdS/TiO<sub>2</sub>/ITO in 0.01 M PBS suffer solution (pH=7.4) containing 0.1 M ascorbic acid solution as electron donor with a light excitation at 400 nm.

Table S1. The recovery studies of AFP

| sample | original<br>(ng/mL) | added<br>(ng/mL) | found<br>(ng/mL) | recoveries | average<br>recoveries |
|--------|---------------------|------------------|------------------|------------|-----------------------|
| 1      | 0.474               | 1.00             | 1.42             | 94.6%      |                       |
| 2      | 1.02                | 1.00             | 2.11             | 109%       | 103%                  |
| 3      | 5.15                | 1.00             | 6.20             | 105%       |                       |
